# Supplementary material for: Parental Control and Children's Short Sleep Duration and Difficulties as Predictors of Screen Time: The Japanese Context
Source: Preprints.org preprint supplement (doi:10.20944/preprints202309.0452.v1), 2023-09-07
Supplement: Supplementary file 1 [file supplementary]

**Table S1.** Estimate of Standardized regression weights

| **Parameter** | | | **Estimate** | **Lower** | **Upper** | **P** |
| --- | --- | --- | --- | --- | --- | --- |
| Chidren's_sleep_duration | <--- | Parent_Bedtime | -0.326 | -0.454 | -0.19 | 0.004 |
| Parental_control | <--- | Children's_Difficulty | -0.062 | -0.179 | 0.077 | 0.421 |
| Chidren's_sleep_duration | <--- | Children's_Difficulty | -0.059 | -0.077 | 0.194 | 0.336 |
| Children's_ScreenTime | <--- | Children's_sleep_duration | -0.282 | -0.401 | -0.121 | 0.006 |
| Children's_ScreenTime | <--- | Children's_Difficulty | 0.167 | 0.046 | 0.3 | 0.008 |
| Children's_ScreenTime | <--- | Parental_control | -0.205 | -0.334 | -0.062 | 0.005 |
